# Mind The Gap: Data availability, accessibility, transparency, and credibility during the COVID-19 pandemic, an international comparative appraisal

Arianna Rotulo<sup>1,2</sup>, Elias Kondilis<sup>3</sup>, Thaint Thwe<sup>4,5</sup>, Sanju Gautam<sup>6</sup>, Özgün Torcu<sup>7</sup>, Maira Vera-Montoya<sup>8</sup>, Sharika Marjan<sup>9</sup>, Md Ismail Gazi<sup>10</sup>, Alifa Syamantha Putri<sup>11</sup>, Rubyath Binte Hasan<sup>12</sup>, Fabia Hannan Mone<sup>13,14,15</sup>, Kenya Rodríguez-Castillo<sup>16</sup>, Arifa Tabassum<sup>17</sup>, Zoi Parcharidi<sup>3</sup>, Beverly Sharma<sup>18</sup>, Fahmida Islam<sup>19</sup>, Babatunde Amoo<sup>20</sup>, Lea Lemke<sup>21</sup>, Valentina Gallo<sup>2</sup>

1. Wolfson Institute of Population Health, Queen Mary, University of London, London, UK
2. Department of Sustainable Health, Campus Fryslân, University of Groningen, Leeuwarden, the Netherlands
3. Health Policy Unit, Aristoteles University, Thessaloniki, Greece
4. Department of Health Sciences, University Medical Centre Groningen, University of Groningen, Groningen, the Netherlands
5. Graduate School of Medical Sciences, University of Groningen, Groningen, the Netherlands
6. Department of Public Health, Faculty of Health Science, University of Southern Denmark
7. Faculty of Medicine, Ege University, Izmir, Türkiye
8. Epidemiology Unit, Universidad del Cauca, Popayán, Colombia
9. Department of Global Health, University of Bergen, Norway
10. Department of Public Health, Daffodil International University, Dhaka, Bangladesh
11. Research Center for Public Health and Nutrition, National Research and Innovation Agency, Cibinong, Indonesia
12. Chittagong Veterinary and Animal Sciences University, Chittagong, Bangladesh
13. Department of Paediatrics, Anwer Khan Modern medical College Hospital, Bangladesh
14. Department of Public Health, Independent University, Bangladesh
15. Institute of Social Welfare & Research, University of Dhaka, Bangladesh
16. Unit Xochimilco, Metropolitan Autonomous University, Mexico City, Mexico
17. Maternal and Child Health Division, International Centre for Diarrhoeal Disease Research, Bangladesh, Dhaka, Bangladesh
18. Sustainalytics, Timisoara, Romania
19. Department of Public Health, North South University, Dhaka, Bangladesh
20. African Field Epidemiology Network, Abuja, Nigeria
21. Bachelor degree in Global Responsibility and Leadership, Campus Fryslân, University of Groningen, Leeuwarden, the Netherlands

## Corresponding author

Dr Valentina Gallo  
Rosalind Franklin Fellow  
Associate Professor of Epidemiology and Sustainable Health  
University of Groningen, Campus Fryslân  
Wirdumerdijk 34  
8911 CE Leeuwarden  
The Netherlands

[v.gallo@azg.nl](mailto:v.gallo@azg.nl) NOTE: This preprint reports new research that has not been certified by peer review and should not be used to guide clinical practice.

## 46 Abstract

47 **Background** – Data transparency has played a key role in this pandemic. The aim of this paper is to map  
48 COVID-19 data availability and accessibility, and to rate their transparency and credibility in selected  
49 countries, by the source of information. This is used to identify knowledge gaps, and to analyse policy  
50 implications.

51 **Methods** – The availability of a number of COVID-19 metrics (incidence, mortality, number of people  
52 tested, test positive rate, number of patients hospitalised, number of patients discharged, the proportion  
53 of population who received at least one vaccine, the proportion of population fully vaccinated) was  
54 ascertained from selected countries for the full population, and for few of stratification variables (age, sex,  
55 ethnicity, socio-economic status) and subgroups (residents in nursing homes, inmates, students,  
56 healthcare and social workers, and residents in refugee camps).

57 **Results** – Nine countries were included: Bangladesh, Indonesia, Iran, Nigeria, Turkey, Panama, Greece,  
58 the UK, and the Netherlands. All countries reported periodically most of COVID-19 metrics on the total  
59 population. Data were more frequently broken down by age, sex, and region than by ethnic group or socio-  
60 economic status. Data on COVID-19 is partially available for special groups.

61 **Conclusions** – This exercise highlighted the importance of a transparent and detailed reporting of COVID-  
62 19 related variables. The more data is publicly available the more transparency, accountability, and  
63 democratisation of the research process is enabled, allowing a sound evidence-based analysis of the  
64 consequences of health policies.

65 **Funding** – This study was conducted as part of the Summer School “Sustainable Health: designing a new,  
66 better normal after COVID-19”. It is a researchers/student collaboration.

67 **Keywords:** COVID-19; incidence; mortality; vaccination; data availability; transparency; trust in  
68 institutions; international comparison

69

## 70 Introduction

71 As the COVID-19 pandemic is raging across the globe, scientific evidence on transmissibility (1) and the  
72 effectiveness of mitigation strategies (2) is accumulating. When translated into health policy, however,  
73 this evidence has produced divergent scenarios (3,4). The efficacy of each public health policy could be  
74 indirectly evaluated through COVID-19 related data, which have been made publicly available by the  
75 majority of the national health authorities, coordinated by the World Health Organisation (WHO) (5), since  
76 the very early days of the pandemic (6).

77 Data transparency has played a key role in this pandemic, facilitating the cross-country comparison of local  
78 and national policies, and their evaluation (7). Collective research efforts on data analysis and prediction  
79 modelling have fostered dialogue between the scientific community, public health authorities, and policy-  
80 makers. However, in many contexts, data availability and transparency have been suboptimal (8,9), a  
81 factor that brought a number of negative repercussions in many sectors.

82 In particular, the breakdown of data reporting by age, sex, region, and ethnic group would help identifying  
83 vulnerable groups, which in turn could inform public health strategies and health policies (10). Further  
84 stratification, e.g. reporting cases and deaths by occupation, or in specific subgroups (e.g. students, health  
85 workers, etc.) would be instrumental to identify patterns of social and health inequalities, and to effectively  
86 manage the epidemic at different levels of governance (8) and to ensure political transparency and  
87 accountability. To our knowledge, no scientific paper before assessed data availability, accessibility,  
88 transparency and credibility internationally, and their related policy implications.

89 The aim of this paper is to map the availability and transparency of COVID-19 data in selected countries,  
90 by source of information, by a number of stratifying variables, and in specific risk groups and to rate their  
91 accessibility and credibility. This information is used to identify knowledge gaps, and to analyse policy  
92 implications.

93

## 94 Methods

95 The Summer School in “Sustainable Health - Designing a new, better normal after COVID-19” took place  
96 remotely between the 5<sup>th</sup> and the 10<sup>th</sup> of July at Campus Fryslân, University of Groningen. The Summer  
97 School attracted a total of 21 students from 14 different countries, from the five continents. All students  
98 were postgraduates with a medical/health-related or social science background. During the week, the  
99 students were invited to identify COVID-19-related data available in their own countries (either their  
100 country of origin or of residence, whose language they were proficient in) and to map their different  
101 sources. Each student filled in a shared spreadsheet prepared in advance by three co-authors (AR, EK, and  
102 VG). As part of the exercise, students were also invited to rank both the overall accessibility and the  
103 credibility of the information. During the last session of the summer school, students were divided into  
104 groups and asked present their findings to the whole group.

### 105 Extraction of data: availability and transparency

106 The extraction tables were designed to be filled in with information from each of the included countries.  
107 Information to be collected included the *availability* to the following periodically reported items: i) number  
108 of new COVID-19 cases (incidence); ii) number of COVID-19 death (mortality); iii) number of people tested  
109 for COVID-19; iv) COVID-19 positive rate (number of those testing positive out of the total number of  
110 people tested); v) number of patients hospitalised with COVID-19; vi) number of patients discharged after  
111 being hospitalised for COVID-19; vii) proportion of the population who received at least one vaccine; viii)  
112 proportion of population fully vaccinated (2/2 or 1/01 at the time, depending on the types of vaccine).

113 The availability of the information described above was collected, by country, for the full population, and  
114 by a number of stratification variables and categories/subgroups. The stratification variables included: 1)  
115 age; 2) sex; 3) subnational regions; 4) ethnic background; 5) socio-economic status.

116 The overall data *transparency* was qualitatively evaluated according to the number of special  
117 categories/subgroups data was regularly reported for. These were: a) residents in nursing homes; b)  
118 inmates; c) students; d) healthcare and social workers; e) refugees or residents in refugee camps. In

119 addition, the availability of information on the number and size of outbreaks in long-term care facilities,  
120 refugee camps, prisons, schools/universities, factories, and nosocomial institutions was also recorded by  
121 country.

## 122 Accessibility and credibility of information

123 By the end of the exercise, a questionnaire was distributed to all participants asking about the accessibility  
124 of data in their researched country, and an overall evaluation of data quality and credibility in function of  
125 the sources. for *accessibility*, students were asked to rate how difficult it was to find the relevant data from  
126 1 (very easy) to 5 (very difficult). For *credibility*, they were asked to rate how credible they thought data  
127 coming from official and unofficial sources were from 1 (not credible at all) to 5 (completely credible). This  
128 judgment is based on informal knowledge of the discourse around COVID-19 data availability in their  
129 countries, and it has been largely discussed during tutorials.

## 130 Public involvement in the research

131 This study is a student-teacher collaboration during the online Summer School in Sustainable Health at  
132 the University of Groningen. The activity was methodologically led by tutors (AR, EK) and relied on the  
133 expertise and contextual knowledge of the students, who contributed to the debate about the importance  
134 of data accessibility with examples from their contexts, and who also took an active role in writing this  
135 paper.

136

## 137 Results

138 A total of nine countries were included in the exercise, with the UK being split into England, Wales,  
139 Scotland, and Northern Ireland, resulting in a total of 12 individual country policies. Of these, four  
140 (Bangladesh, Indonesia, Iran, Nigeria) were classified as lower-middle income countries; two (Turkey,  
141 Panama) as upper-middle income countries; and three (Greece, Netherlands, United Kingdom) as high-

142 income countries, according to the latest World Bank classification(11). For each country, at least one  
143 person fluent in the official language of the country and with some public health/health system  
144 background, familiarised with the main data repositories and websites of public relevance and was  
145 responsible for data searching and extraction.

## 146 Data availability and accessibility

147 Data availability for the included countries is shown in Figure 1. All countries regularly reported the total  
148 number of COVID-19 cases, mortality, testing, hospital admissions, and vaccination from official sources  
149 periodically, with few exceptions: in Nigeria the COVID-19 positive rate, the hospitalisation, and the  
150 proportion of the population partially vaccinated were not available. In the Netherlands, the number of  
151 people discharged after being treated for COVID-19 was not available.

152 Data availability of COVID-19 data per stratification variables (age, sex, region, ethnicity, and socio-  
153 economic status) are reported in Figure 1. Overall, data were more frequently broken down by age, sex,  
154 and region than by ethnic group or socio-economic status. Variations were observed in terms of  
155 disaggregated data in the same income category. The only countries reporting an adequate break-down  
156 per stratification variables were the British ones. The Netherlands, Greece, and Turkey reported some  
157 break-down by age, sex, and region only for incidence, mortality, and hospitalisation data. However, the  
158 information did not always come from official sources. Bangladesh and Indonesia reported some break-  
159 down by age, sex, and region only for incidence and mortality data. Iran, Nigeria, and Panama reported  
160 little to no broken-down data on all COVID-19 Indicators.

161 Overall, discharge after COVID-19 resulted to be the category with the least data available by stratification  
162 variables. COVID-19 incidence, mortality, and hospitalisation were the variables that more often were  
163 presented according to different stratification variables categories. Stratification of data on vaccination  
164 was reported only in the four UK countries, and partially in Indonesia, the Netherlands, and Greece.

165 On average, *data accessibility* was considered difficult: on a scale from 1 (very easy) to 5 (very difficult), the  
166 mode was 4 (difficult), rated so by 5 participants (35.7%).

## 167 Transparency of data reporting and credibility

168 Results of the analysis of data in special sub-groups (residents in nursing homes, inmates, students,  
169 healthcare & social workers, and refugees) are reported in Figure 2. Data mainly on COVID-19 incidence  
170 and mortality is partially available in a number of countries, while data for the other COVID-19 related  
171 variables are more scattered. The country which best reports data according to special categories is  
172 Scotland with official/unofficial sources covering most of the fields, particularly among students and  
173 health care workers (incidence, mortality, number of tests, positivity rate, vaccine). All UK countries,  
174 except for Northern Ireland reported data on vaccination among residents in nursing homes and  
175 healthcare and social workers, but data on COVID-19 incidence and mortality among healthcare and social  
176 workers is incomplete or coming from unofficial sources in England and Wales. COVID-19 among refugees  
177 was officially reported only by Bangladesh (incidence, mortality, and testing); in Greece data on incidence  
178 was partially complete, in England, Wales, and Scotland the data was reported by unofficial sources. Data  
179 on COVID-19 incidence among inmates was sporadically available from official sources only in Bangladesh,  
180 Indonesia, England, Northern Ireland, and Scotland; in Panama and the Netherlands the data was  
181 gathered from unofficial sources. Data on COVID-19 related mortality were also available in Indonesia, the  
182 Netherlands, England, Scotland, and Wales. Data on vaccination was available only in Indonesia from  
183 unofficial sources.

184 Interestingly, the majority of the authors who extracted the data rated the *credibility* of both official and  
185 unofficial sources as high: the mode being in both cases 4 (very credible) rated so by 5 participants (35.7%).

186

## 187 Discussion

188 This paper reports a first attempt to appraise in a systematic way COVID-19 related data from a selected  
189 number of countries by type of data, stratification variables, and special sub-groups. It prompted a number  
190 considerations around the issue of data availability and transparency and the importance of these in

191 pandemic management. Overall, the results suggest an unprecedented effort in collating and making  
192 epidemiological data publicly and widely available to the general public from trustworthy sources, despite  
193 the fact that such data were considered not always easy to find and access. Varying levels of available  
194 budget and infrastructures in high- and low-income countries have not generated significant differences  
195 in data availability and accessibility, at least for collated, not stratified data.

196 Access to stratified data is essential to uncover inequalities in COVID-19 morbidity (10,12–15). Among the  
197 included countries, the UK, and – to some extent – Indonesia, had the most accessible data. Refined data  
198 availability by regions and Middle-Layer Super Output Areas (MSOA) in England, for example, allowed to  
199 explore the relative role of spatial inequalities and of structural factors in explaining the geographical  
200 distribution of COVID-19 mortality (14). Availability of data by age and sex allowed to estimate the  
201 reduction of life expectancy at birth and lifespan inequalities (16). Data broken down by ethnic group as  
202 reported by the Office for National Statistics (ONS) in the UK (17) prompted a parliamentary investigation  
203 on why COVID-19 mortality rates were highest among people from Black, Asian, and Minority Ethnic  
204 (BAME) groups, with Black males 3.3 times more likely to die compared to their white counterparts (17,18).  
205 The investigation resulted in a report (19) suggesting that racism, discrimination, and social inequalities  
206 have contributed to the increased risks not only of infection but also of complications and death from  
207 COVID-19 among minority ethnic people (18). Importantly, the report emphasised that longstanding  
208 inequalities affecting BAME communities in the UK were exacerbated by the conditions under which  
209 BAME people live (18). Similar disparities based on ethnicity and migration status were found in other  
210 countries such as Sweden (20). The ethnic break-down for vaccine intake is also a crucial piece of  
211 information to identify groups whose uptake is suboptimal and to tailor appropriate public health  
212 campaigns (21).

213 When sex-disaggregated data are available, observed inequalities within a country can be appraised in the  
214 light of the relative effect of biological factors (22,23) and gender norms (24). Differences between male  
215 and female rates of COVID-19 cases and deaths are larger in countries where women experience more



216 discrimination within families and have less access to resources, education, and finance (25). Sex-stratified  
217 data in the United States also suggested a different attitude toward vaccine intake between men and  
218 women (26). Neglecting sex and gender differences in COVID-19 renders these gender/sex-specific  
219 challenges effects unobservable (26). On the other hand, combining such information with data on ethnic  
220 background allows an intersectional approach to better understand the relative role of social and biological  
221 factors (27).

222 Data reporting broken down by geographical and demographic strata facilitates international comparison  
223 (28) and points out inequalities in varying country contexts (29–31). In the context of vaccination uptake  
224 and availability, it can prompt reflections on vaccination equity and the success of the COVAX programme  
225 (32).

226 The transparency of reporting of COVID-19 incidence and mortality in special categories has contributed  
227 to a better understanding of the main mechanisms of transmission (33) and the role of inequalities (34),  
228 and occupational hazards (35), but has also increased transparency and accountability of health policy  
229 decisions. Having observed the very high number of COVID-19-related deaths in nursing homes in  
230 England, the UK High Court recently established that the decision – in spring 2020 – to discharge people  
231 from hospitals to care homes without mandatory isolation or testing was *irrational* and *unlawful* (36). Data  
232 coming from special categories (i.e., prison inmates, people in detention centres and reception centres)  
233 can inform the issue of special guidelines for prevention in those contexts (37). Nevertheless, COVID-19  
234 data reporting for these categories remains specifically underreported and therefore understudied (38).

235 Monitoring of the available COVID-19 data at the international level has been done by several institutions  
236 (5,39) and initiatives (40,41). Their work has been extensively used to analyse the rapidly evolving situation  
237 (7,42), as well as to estimate international (43,44) and national (45) interventions and policies, and their  
238 impact. On the other hand, the unavailability of timely and complete data can elicit misinformation and  
239 disinformation among the public, which eventually might hamper the overall health policy enforced (46).

240 The transparent, thorough, and complete report from national authorities has been the necessary first step  
241 to allow so.

242 At the time of writing, the world is living into its third year of COVID-19 pandemic, with an internationally  
243 shared sense of grief and fatigue, and uncertainty about the future. It is now more important than ever  
244 that the public maintains trust in the institutions (47) and follows government indications to test and  
245 receive vaccinations (48–50). Trust in institutions is also likely to induce populations to share crucial  
246 information (51) thereby maintaining an effective surveillance system.

247 Among other things, trust can be enhanced by a transparent and detailed report of available data which  
248 increases the accountability of public health authorities (8). Data transparency can also democratise the  
249 research effort in fighting the pandemic, ultimately promoting an evidence-based best practice less  
250 sensitive to vested interests and political agenda influences.

## 251 **Strengths and limitation**

252 This study compares COVID-19 data availability, accessibility, transparency, and credibility in nine  
253 resource different and geographically distant countries. Importantly, it maps both official and unofficial  
254 sources of information and data access was performed by post-graduate public health/health system  
255 professionals who were familiar with the cultural context, the language, and the main reporting sources of  
256 each country. Despite the inclusion of more countries would have increased the quality of the cross-  
257 sectional comparison, the present data aims at exemplifying the importance of detailed data reporting  
258 rather to provide a comprehensive picture.

259

## 260 **Conclusions**

261 In conclusion, this exercise maps a varied combination of COVID-19 related data and their sources.  
262 Reported evidence highlighted the importance of a transparent and detailed reporting of COVID-19  
263 related variables by public authorities. The more data is publicly available, the more the research process

264 can benefit from transparency, accountability, and democratisation. This allows a sound evidence-based  
265 analysis of the consequences of different health policies. Through this mapping exercise, public health  
266 regulators can benchmark how well current information sharing policy is working in different parts of the  
267 world. The World Health Organisation can nudge public health authorities, leading the way in improving  
268 data sharing.

269

## 270 References

- 271 1. Buonanno G, Robotto A, Brizio E, Morawska L, Civra A, Corino F, et al. Link between SARS-CoV-2  
272 emissions and airborne concentrations: Closing the gap in understanding. *J Hazard Mater.* 2022 Apr  
273 15;428:128279.
- 274 2. Cypionka T, Greenhalgh T, Bassler D, Bryant MB. Masks and Face Coverings for the Lay Public : A  
275 Narrative Update. *Ann Intern Med.* 2021 Apr;174(4):511–20.
- 276 3. Giritli Nygren K, Olofsson A. Managing the Covid-19 pandemic through individual responsibility: the  
277 consequences of a world risk society and enhanced ethopolitics. *Journal of Risk Research.* 2020 Aug  
278 2;23(7–8):1031–5.
- 279 4. Pavlova A, Witt K, Scarth B, Fleming T, Kingi-Uluave D, Sharma V, et al. The Use of Helplines and  
280 Telehealth Support in Aotearoa/New Zealand During COVID-19 Pandemic Control Measures: A  
281 Mixed-Methods Study. *Front Psychiatry.* 2021;12:791209.
- 282 5. WHO Coronavirus (COVID-19) Dashboard [Internet]. [cited 2021 Jun 14]. Available from:  
283 <https://covid19.who.int>
- 284 6. Gallo V, Chiodini P, Bruzzese D, Bhopal R. Age-and sex-adjustment and the COVID-19 pandemic -  
285 transformative example from Italy. *Int J Epidemiol.* 2020 Oct 1;49(5):1730–2.
- 286 7. Gallo V, Chiodini P, Bruzzese D, Kondilis E, Howdon D, Mierau J, et al. Comparing the COVID-19  
287 pandemic in space and over time in Europe, using numbers of deaths, crude rates and adjusted  
288 mortality trend ratios. *Sci Rep.* 2021 Aug 12;11(1):16443.
- 289 8. Kondilis E, Papamichail D, Gallo V, Benos A. COVID-19 data gaps and lack of transparency  
290 undermine pandemic response. *J Public Health (Oxf).* 2021 Jun 7;43(2):e307–8.
- 291 9. Mathieu E. Commit to transparent COVID data until the WHO declares the pandemic is over. *Nature.*  
292 2022 Feb 22;602(7898):549–549.
- 293 10. Bambra C, Riordan R, Ford J, Matthews F. The COVID-19 pandemic and health inequalities. *J*  
294 *Epidemiol Community Health.* 2020 Nov;74(11):964–8.
- 295 11. New World Bank country classifications by income level: 2021-2022 [Internet]. [cited 2022 Feb 28].  
296 Available from: [https://blogs.worldbank.org/opendata/new-world-bank-country-classifications-](https://blogs.worldbank.org/opendata/new-world-bank-country-classifications-income-level-2021-2022)  
297 [income-level-2021-2022](https://blogs.worldbank.org/opendata/new-world-bank-country-classifications-income-level-2021-2022)
- 298 12. Mena GE, Martinez PP, Mahmud AS, Marquet PA, Buckee CO, Santillana M. Socioeconomic status  
299 determines COVID-19 incidence and related mortality in Santiago, Chile. *Science.* 2021 May  
300 28;372(6545):eabg5298.
- 301 13. Mathur R, Rentsch CT, Morton CE, Hulme WJ, Schultze A, MacKenna B, et al. Ethnic differences in  
302 SARS-CoV-2 infection and COVID-19-related hospitalisation, intensive care unit admission, and  
303 death in 17 million adults in England: an observational cohort study using the OpenSAFELY platform.  
304 *Lancet.* 2021 May 8;397(10286):1711–24.
- 305 14. Griffith GJ, Davey Smith G, Manley D, Howe LD, Owen G. Interrogating structural inequalities in  
306 COVID-19 mortality in England and Wales. *J Epidemiol Community Health.* 2021 Dec;75(12):1165–71.
- 307 15. Platt L, Warwick R. COVID-19 and Ethnic Inequalities in England and Wales. *Fisc Stud.* 2020 Jun 3;

- 308 16. Aburto JM, Kashyap R, Schöley J, Angus C, Ermisch J, Mills MC, et al. Estimating the burden of the  
309 COVID-19 pandemic on mortality, life expectancy and lifespan inequality in England and Wales: a  
310 population-level analysis. *J Epidemiol Community Health*. 2021 Aug;75(8):735–40.
- 311 17. Coronavirus (COVID-19) related deaths by ethnic group, England and Wales - Office for National  
312 Statistics [Internet]. [cited 2022 Apr 25]. Available from:  
313 [https://www.ons.gov.uk/peoplepopulationandcommunity/birthsdeathsandmarriages/deaths/articles](https://www.ons.gov.uk/peoplepopulationandcommunity/birthsdeathsandmarriages/deaths/articles/coronaviruscovid19relateddeathsbyethnicgroupenglandandwales/2march2020to15may2020)  
314 [/coronaviruscovid19relateddeathsbyethnicgroupenglandandwales/2march2020to15may2020](https://www.ons.gov.uk/peoplepopulationandcommunity/birthsdeathsandmarriages/deaths/articles/coronaviruscovid19relateddeathsbyethnicgroupenglandandwales/2march2020to15may2020)
- 315 18. Keys C, Nanayakkara G, Onyejekwe C, Sah RK, Wright T. Health Inequalities and Ethnic  
316 Vulnerabilities During COVID-19 in the UK: A Reflection on the PHE Reports. *Fem Leg Stud*.  
317 2021;29(1):107–18.
- 318 19. Beyond the Data: Understanding the Impact of COVID-19 on BAME Communities. :69.
- 319 20. Bredström A, Mulinari S. Conceptual unclarity about COVID-19 ethnic disparities in Sweden:  
320 Implications for public health policy. *Health (London)*. 2022 Feb 13;13634593221074866.
- 321 21. Sina-Odunsi AJ. COVID-19 vaccines inequity and hesitancy among African Americans. *Clin Epidemiol*  
322 *Glob Health*. 2021 Dec;12:100876.
- 323 22. Gebhard C, Regitz-Zagrosek V, Neuhauser HK, Morgan R, Klein SL. Impact of sex and gender on  
324 COVID-19 outcomes in Europe. *Biol Sex Differ*. 2020 May 25;11(1):29.
- 325 23. Haitao T, Vermunt JV, Abeykoon J, Ghamrawi R, Gunaratne M, Jayachandran M, et al. COVID-19 and  
326 Sex Differences: Mechanisms and Biomarkers. *Mayo Clin Proc*. 2020 Oct;95(10):2189–203.
- 327 24. Gausman J, Langer A. Sex and Gender Disparities in the COVID-19 Pandemic. *J Womens Health*  
328 (Larchmt). 2020 Apr;29(4):465–6.
- 329 25. Aleksanyan Y, Weinman JP. Women, men and COVID-19. *Soc Sci Med*. 2022 Feb;294:114698.
- 330 26. O’Grady C. Sex and gender missing in COVID-19 data. *Science*. 2021 Jul 9;373(6551):145.
- 331 27. Kopel J, Perisetti A, Roghani A, Aziz M, Gajendran M, Goyal H. Racial and Gender-Based Differences  
332 in COVID-19. *Front Public Health*. 2020;8:418.
- 333 28. Mathieu E, Ritchie H, Ortiz-Ospina E, Roser M, Hasell J, Appel C, et al. A global database of COVID-  
334 19 vaccinations. *Nat Hum Behav*. 2021 Jul;5(7):947–53.
- 335 29. Duffy C, Newing A, Górska J. Evaluating the Geographical Accessibility and Equity of COVID-19  
336 Vaccination Sites in England. *Vaccines (Basel)*. 2021 Dec 30;10(1):50.
- 337 30. McKinnon B, Quach C, Dubé È, Tuong Nguyen C, Zinszer K. Social inequalities in COVID-19 vaccine  
338 acceptance and uptake for children and adolescents in Montreal, Canada. *Vaccine*. 2021 Dec  
339 3;39(49):7140–5.
- 340 31. Aktürk Z, Linde K, Hapfelmeier A, Kunisch R, Schneider A. COVID-19 vaccine hesitancy in people  
341 with migratory backgrounds: a cross-sectional study among Turkish- and German-speaking citizens  
342 in Munich. *BMC Infect Dis*. 2021 Dec 6;21(1):1214.
- 343 32. Bolcato M, Rodriguez D, Feola A, Di Mizio G, Bonsignore A, Ciliberti R, et al. COVID-19 Pandemic and  
344 Equal Access to Vaccines. *Vaccines (Basel)*. 2021 May 21;9(6):538.

- 345 33. Leibowitz AI, Siedner MJ, Tsai AC, Mohareb AM. Association Between Prison Crowding and COVID-  
346 19 Incidence Rates in Massachusetts Prisons, April 2020-January 2021. *JAMA Intern Med.* 2021 Oct  
347 1;181(10):1315–21.
- 348 34. Crispim J de A, Ramos ACV, Berra TZ, Santos MSD, Santos FLD, Alves LS, et al. Impact and trend of  
349 COVID-19 in the Brazilian prison system: an ecological study. *Cien Saude Colet.* 2021 Jan;26(1):169–  
350 78.
- 351 35. Nafilyan V, Pawelek P, Ayoubkhani D, Rhodes S, Pembrey L, Matz M, et al. Occupation and COVID-  
352 19 mortality in England: a national linked data study of 14.3 million adults. *Occup Environ Med.* 2021  
353 Dec 27;0emed-2021-107818.
- 354 36. Booth R, correspondent RBS affairs. Covid care home discharge policy was unlawful, says court. *The*  
355 *Guardian* [Internet]. 2022 Apr 27 [cited 2022 Apr 28]; Available from:  
356 [https://www.theguardian.com/world/2022/apr/27/covid-discharging-untested-patients-into-care-](https://www.theguardian.com/world/2022/apr/27/covid-discharging-untested-patients-into-care-homes-was-unlawful-says-court)  
357 [homes-was-unlawful-says-court](https://www.theguardian.com/world/2022/apr/27/covid-discharging-untested-patients-into-care-homes-was-unlawful-says-court)
- 358 37. Wang J, Yang W, Pan L, Ji JS, Shen J, Zhao K, et al. Prevention and control of COVID-19 in nursing  
359 homes, orphanages, and prisons. *Environ Pollut.* 2020 Nov;266(Pt 1):115161.
- 360 38. Lemasters K, McCauley E, Nowotny K, Brinkley-Rubinstein L. COVID-19 cases and testing in 53  
361 prison systems. *Health Justice.* 2020 Dec 11;8(1):24.
- 362 39. COVID-19 situation update for the EU/EEA, as of 27 April 2022 [Internet]. European Centre for  
363 Disease Prevention and Control. [cited 2022 Apr 29]. Available from:  
364 <https://www.ecdc.europa.eu/en/cases-2019-ncov-eueea>
- 365 40. Coronavirus Pandemic (COVID-19) - Our World in Data [Internet]. [cited 2022 Apr 29]. Available  
366 from: <https://ourworldindata.org/coronavirus>
- 367 41. COVID-19 Disability Rights Monitor [Internet]. [cited 2022 Jul 23]. Available from:  
368 <https://www.covid-drm.org/data>
- 369 42. Gallo V, Vineis P, Cancellieri M, Chiodini P, Barker RA, Brayne C, et al. Exploring causality of the  
370 association between smoking and Parkinson’s disease. *Int J Epidemiol.* 2018 Nov 20;
- 371 43. Kennedy DS, Vu VK, Ritchie H, Bartlein R, Rothschild O, Bausch DG, et al. COVID-19: Identifying  
372 countries with indicators of success in responding to the outbreak. *Gates Open Res.* 2020;4:62.
- 373 44. Braithwaite J, Tran Y, Ellis LA, Westbrook J. The 40 health systems, COVID-19 (4oHS, C-19) study. *Int*  
374 *J Qual Health Care.* 2021 Feb 20;33(1):mzaa113.
- 375 45. Spooner F, Abrams JF, Morrissey K, Shaddick G, Batty M, Milton R, et al. A dynamic microsimulation  
376 model for epidemics. *Soc Sci Med.* 2021 Dec;291:114461.
- 377 46. Baines D, Elliott R. Defining misinformation, disinformation and malinformation: An urgent need for  
378 clarity during the COVID-19 infodemic [Internet]. Department of Economics, University of  
379 Birmingham; 2020 Apr [cited 2022 May 8]. Available from:  
380 <https://econpapers.repec.org/paper/birbirmec/20-o6.htm>
- 381 47. Ayalon L. Trust and Compliance with COVID-19 Preventive Behaviors during the Pandemic. *Int J*  
382 *Environ Res Public Health.* 2021 Mar 5;18(5):2643.

- 383 48. González-Melado FJ, Di Pietro ML. The vaccine against COVID-19 and institutional trust. *Enferm*  
384 *Infec Microbiol Clin (Engl Ed)*. 2021 Dec;39(10):510–5.
- 385 49. Bogart LM, Ojikutu BO, Tyagi K, Klein DJ, Mutchler MG, Dong L, et al. COVID-19 Related Medical  
386 Mistrust, Health Impacts, and Potential Vaccine Hesitancy Among Black Americans Living With HIV.  
387 *J Acquir Immune Defic Syndr*. 2021 Feb 1;86(2):200–7.
- 388 50. Benin AL, Wisler-Scher DJ, Colson E, Shapiro ED, Holmboe ES. Qualitative analysis of mothers'  
389 decision-making about vaccines for infants: the importance of trust. *Pediatrics*. 2006  
390 May;117(5):1532–41.
- 391 51. Lu L, Liu J, Yuan YC, Burns KS, Lu E, Li D. Source Trust and COVID-19 Information Sharing: The  
392 Mediating Roles of Emotions and Beliefs About Sharing. *Health Educ Behav*. 2021 Apr;48(2):132–9.
- 393

*Figure 1: Heatmap illustrating the availability of data on a number of COVID-19 variables in 12 selected countries (divided into lower middle-income in orange; upper middle-income in dark green; and high income in teal) in total, and by a number of stratifying variables. Green: complete data from official source; yellow: incomplete data from official source; blue: data from unofficial source.*

*Figure 2: Heatmap illustrating the availability of data in a number of COVID-19 variables in 12 selected countries (divided into lower middle-income in orange; upper middle-income in dark green; and high income in teal) in a number of population sub-groups. Green: complete data from official source; yellow: incomplete data from official source; blue: data from unofficial source*



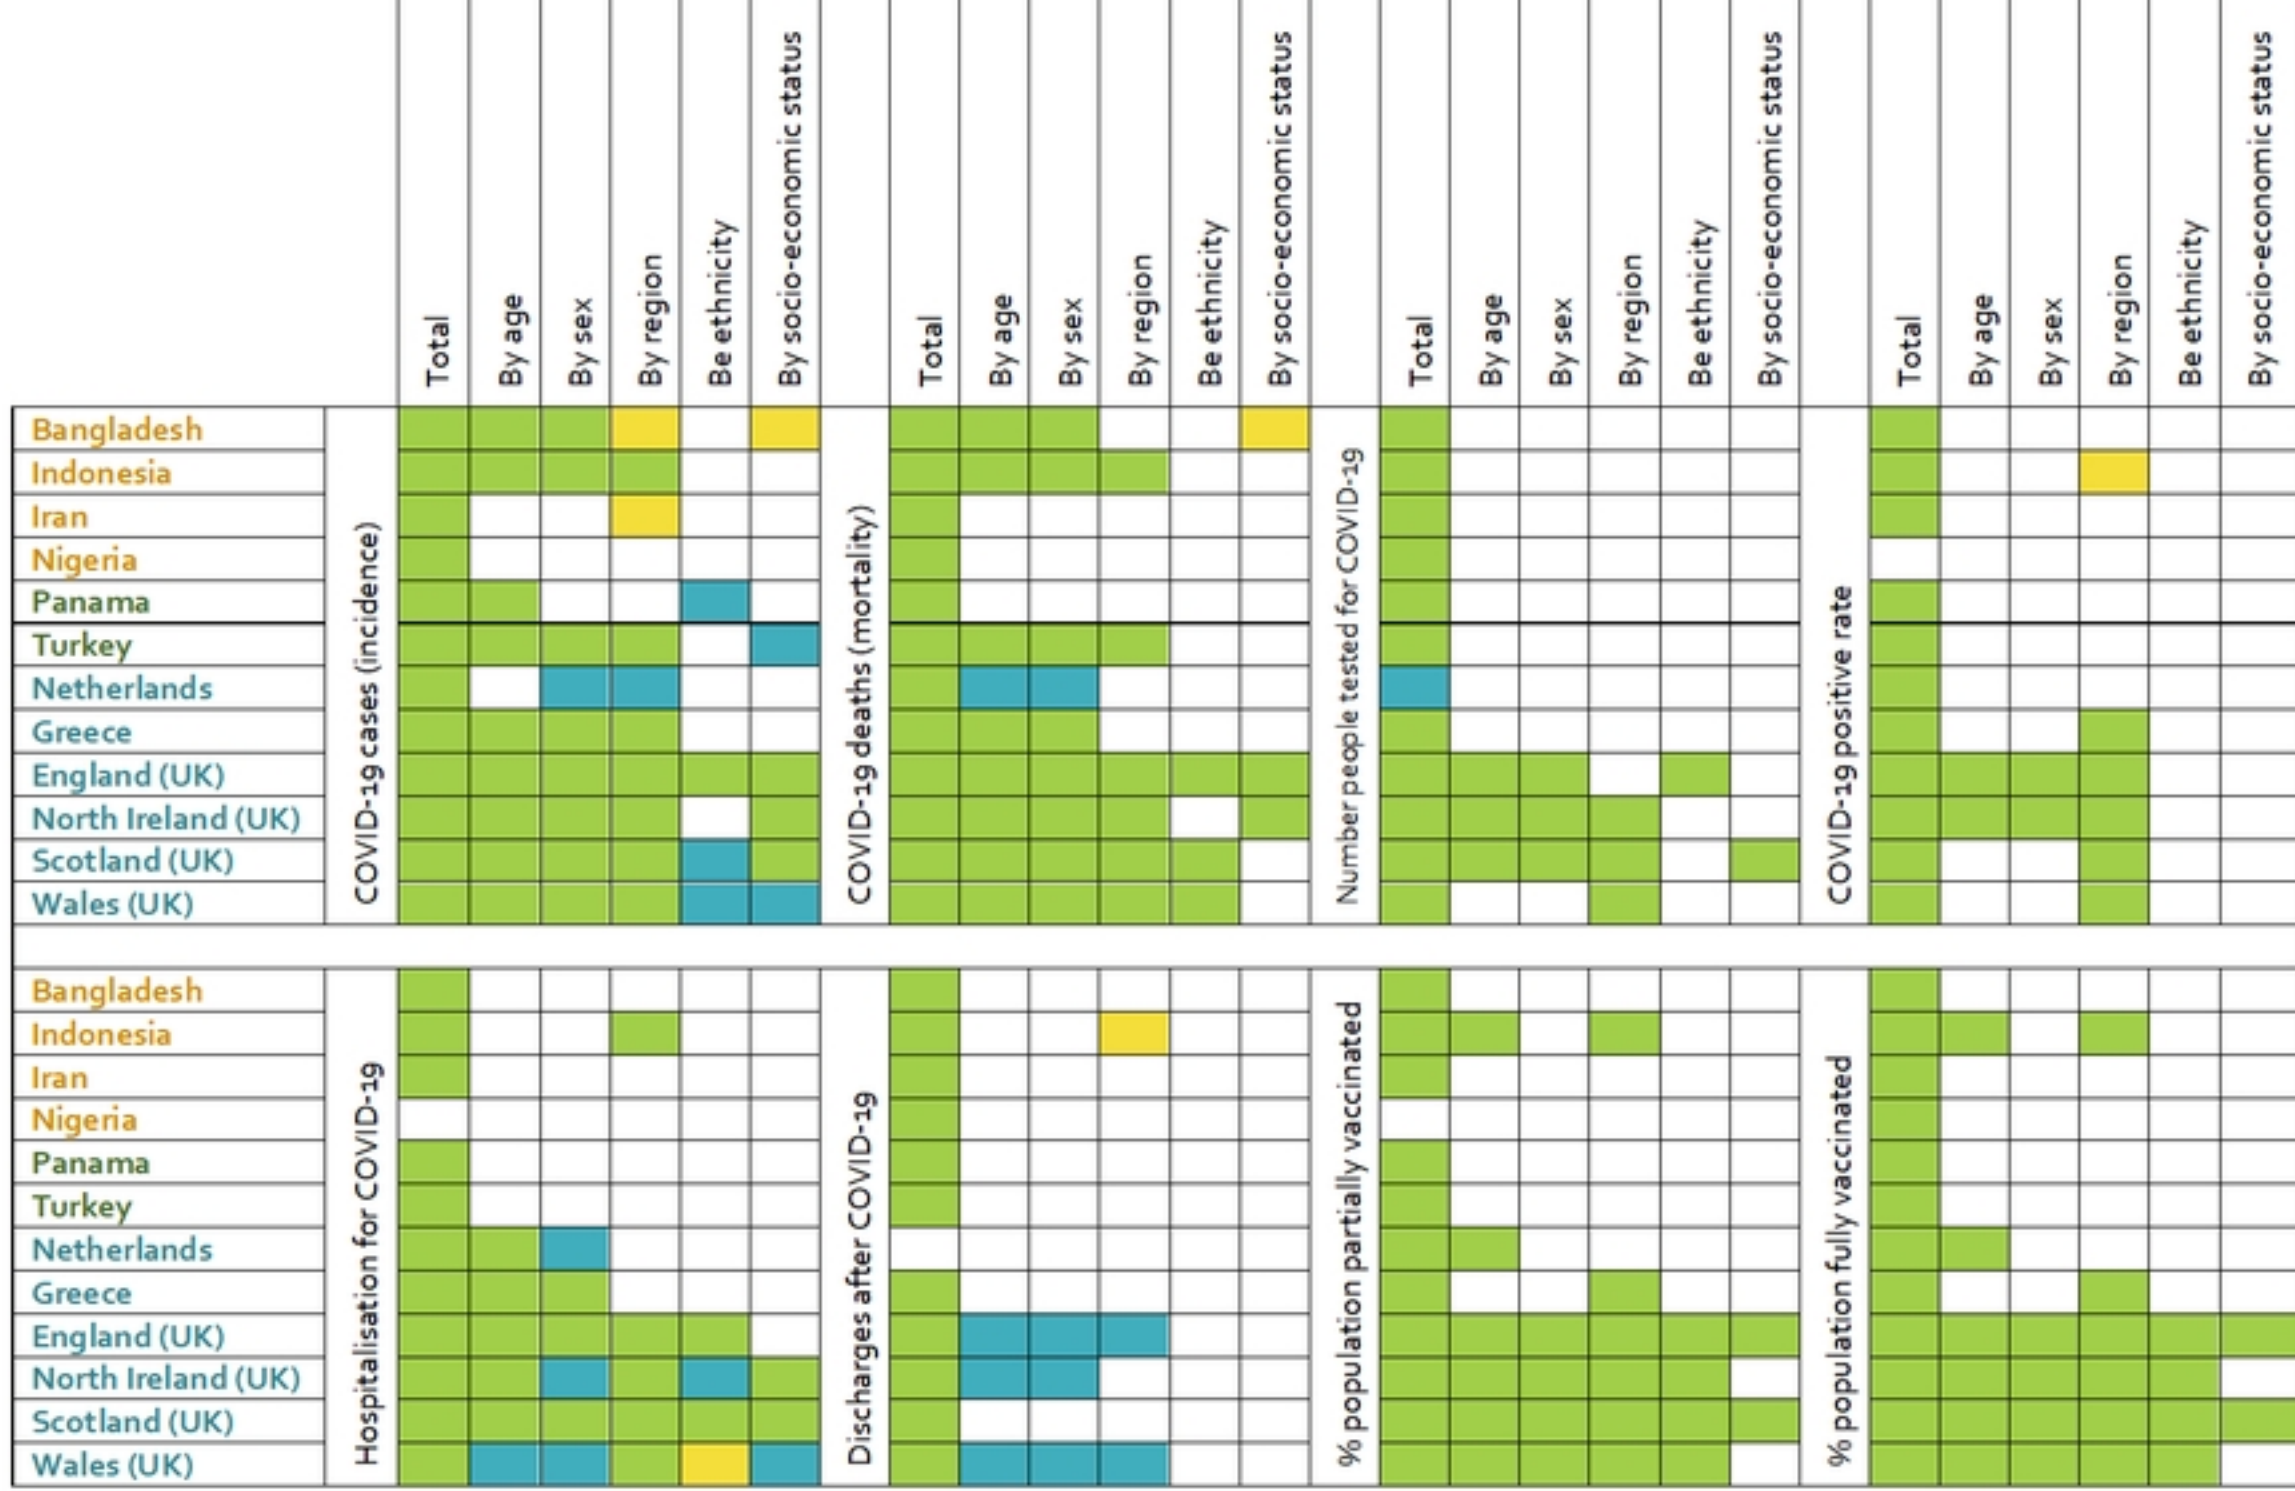

Figure 1
